# Supplementary material for: CCL2-SQSTM1 positive feedback loop suppresses autophagy to promote chemoresistance in gastric cancer
Source: PubMed Central journal article supplement — Int J Biol Sci. 2018 Jun 3;14(9):1054–66. doi: 10.7150/ijbs.25349 (PMC6036739; doi:10.7150/ijbs.25349), 2018-06-03
Supplement: ijbsv14p1054s1.pdf [file ijbsv14p1054s1.pdf]

## Supplementary figure 1

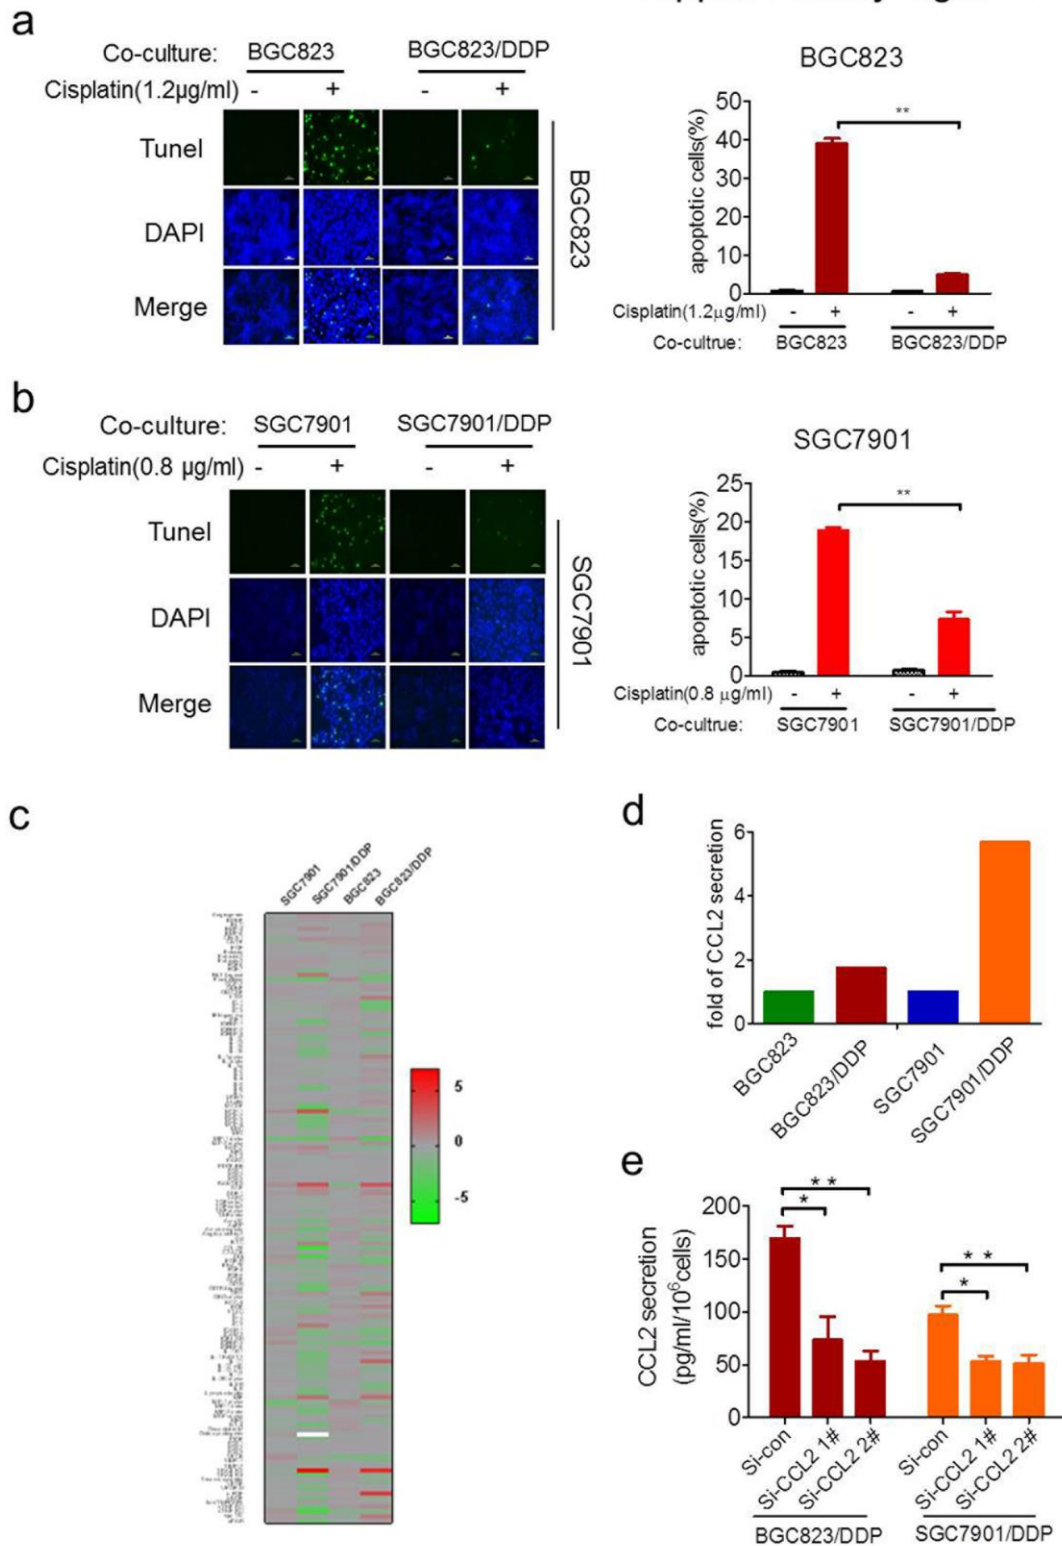

**Supplementary Figure 1.** (a-b) The apoptosis of BGC823 (a) and SGC7901 (b) treated as in Figure 1c were analyzed by the TUNEL assay (c) hot map of differential cytokines in cisplatin resistant cell. (d) Fold change of CCL2 in the conditional mediums, which were used for screening cytokines with cytokine antibody array. (e) CCL2 level in the conditional

medium of BGC823/DDP and SGC7901/DDP cells transfected with CCL2 siRNA was determined by ELISA. (\* $P$ <0.05, \*\* $P$ <0.01)

### Supplementary figure 2

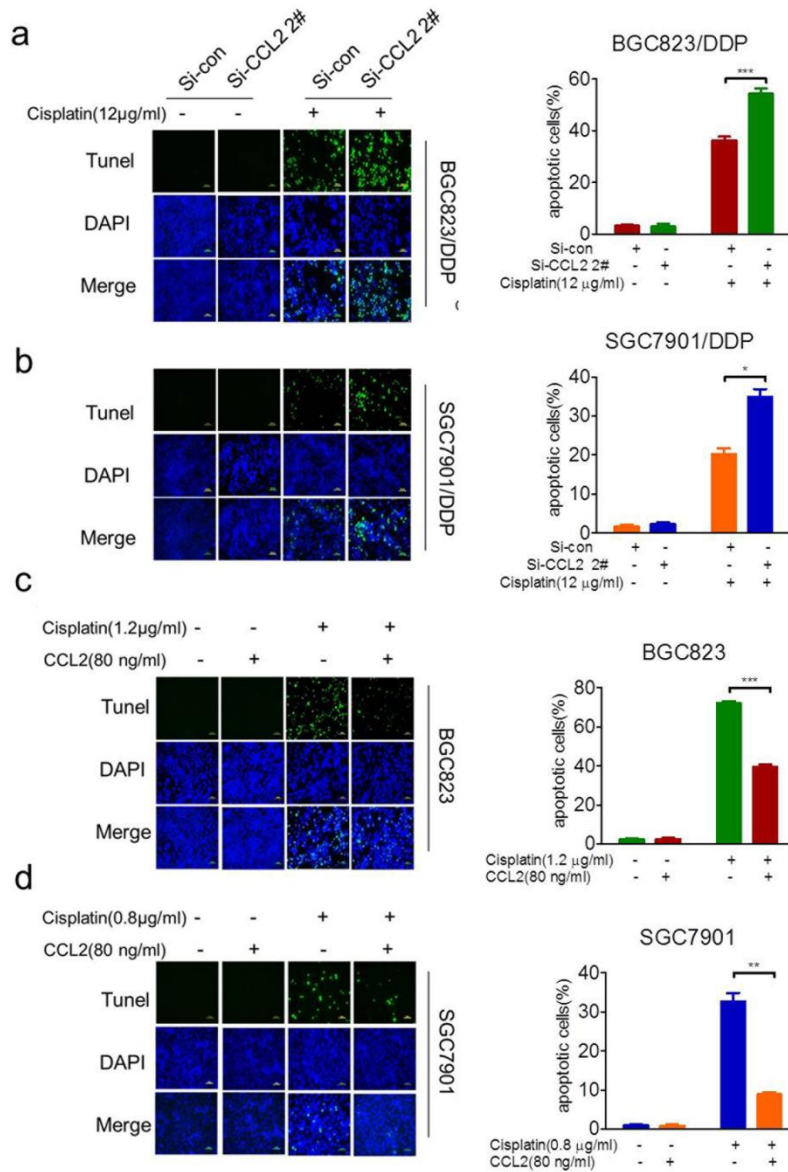

**Supplementary Figure 2. (a-b)** The apoptosis of BGC823/DDP (a) and SGC7901/DDP (b) cells treated as in Figure 2A was determined by the TUNEL assay **(c-d)** The apoptosis of BGC823 (c) and SGC7901 (d) cells treated as in Figure 2D was determined by the TUNEL assay. (\* $P$ <0.05, \*\* $P$ <0.01, \*\*\* $P$ <0.001)

Supplementary figure 3

a

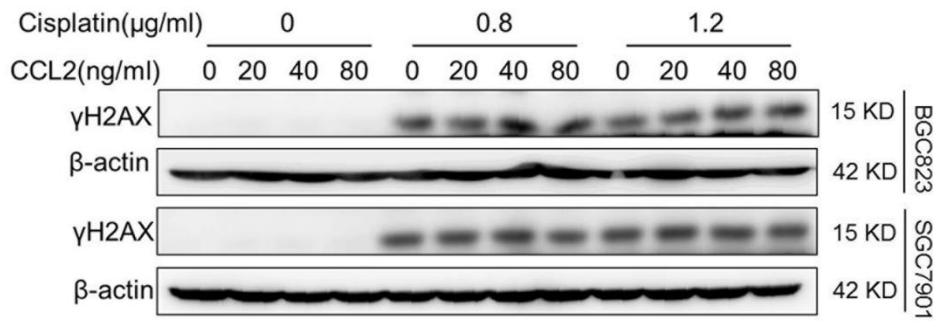

b

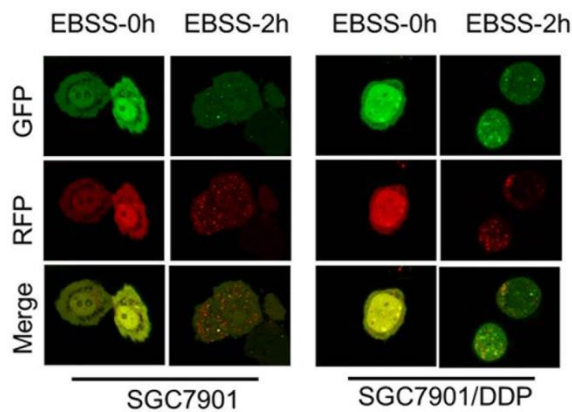

c

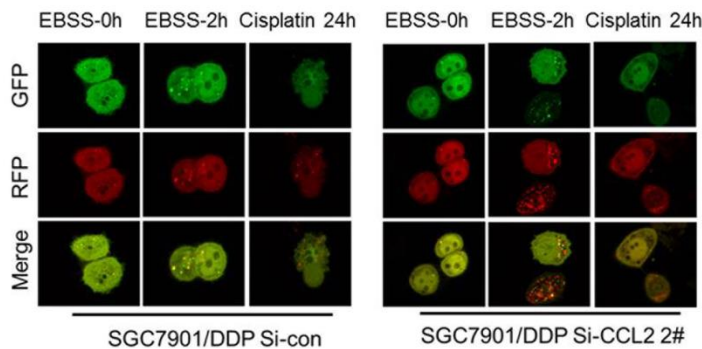

**Supplementary Figure 3. (a)** The levels of  $\gamma$ H2AX in cisplatin treated BGC823 and SGC7901 cells with or without recombinant CCL2 incubation were determined by Western blotting. **(b)** The effect of EBSS incubation on mRFP-GFP-LC3 distribution in BGC823, BGC823/DDP, SGC7901 and SGC7901/DDP cells was analyzed by confocal microscopy after 48 h of mRFP-GFP-LC3 plasmid transfection. **(c)** The effect of EBSS or cisplatin incubation on autophagy flux in CCL2 knockdown SGC7901/DDP cells transfected with mRFP-GFP-LC3 was analyzed by confocal microscopy.

## Supplementary figure 4

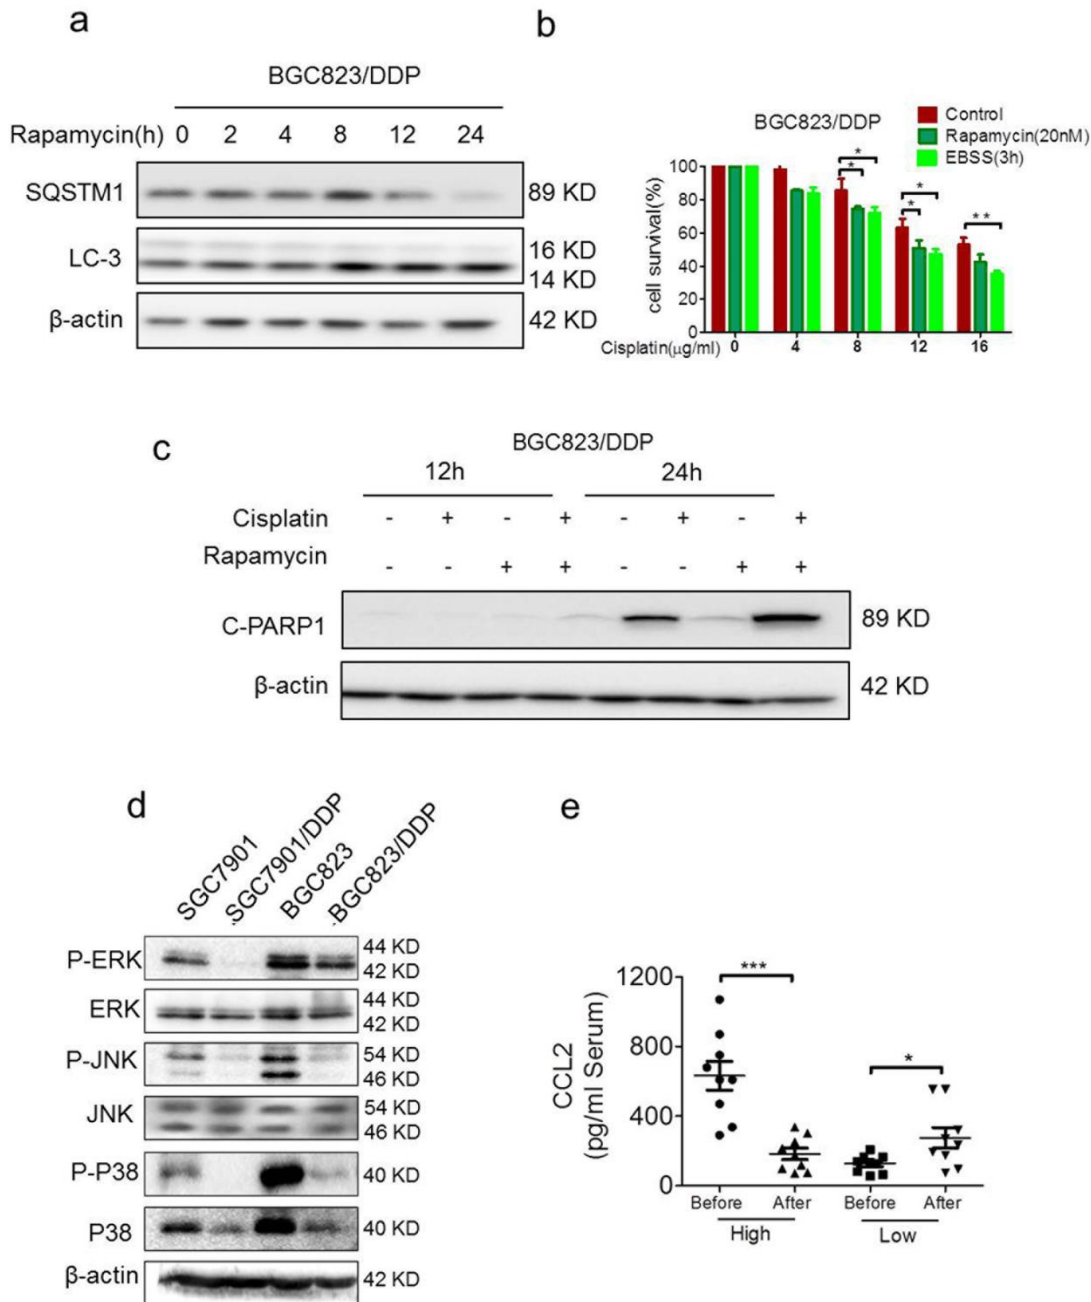

**Supplementary Figure 4.** (a) The LC-3 and SQSTM1 levels in BGC823/DDP cells before and after rapamycin treatment were determined by Western blotting. (b) The viability of cisplatin-treated BGC823 cells in the presence or absence of rapamycin or EBSS were determined by CCK-assay. (c) Cisplatin-induced apoptosis in BGC823/DDP cells before and after rapamycin treatment were determined by Western blotting. (d) The expression of ERK, P-ERK, JNK, P-JNK, P38, P-38 in various cells were determined by Western blotting. (e) The levels of CCL2 in before and after surgery gastric cancer patients' sera were detected by ELSIA (High: n=9, Low: n=9). (\* $P$ <0.05, \*\* $P$ <0.01, \*\*\* $P$ <0.001)

**Supplementary table**

| Name         | Sample signal value |                |           |               | Sample comparison results |          |
|--------------|---------------------|----------------|-----------|---------------|---------------------------|----------|
|              | SGC7901 1#          | SGC7901/DDP 2# | BGC823 3# | BGC823/DDP 4# | 2# vs 1#                  | 4# vs 3# |
| Angiogenin   | 16597.5             | 31910          | 23993     | 20009         | 1.92                      | 0.83     |
| BDNF         | 161                 | 205.5          | 202       | 154.5         | 1.28                      | 0.76     |
| BLC          | 17.5                | 15             | 14        | 26            |                           |          |
| BMP-4        | 56                  | 109.5          | 60.5      | 77            |                           |          |
| BMP-6        | 106                 | 101            | 103.5     | 142.5         |                           |          |
| CKb8-1       | 13                  | 37             | 31        | 29            |                           |          |
| CNTF         | 76                  | 87.5           | 113       | 138           |                           |          |
| EGF          | 154                 | 105            | 132.5     | 107           |                           |          |
| Eotaxin      | 64.5                | 59.5           | 62.5      | 86.5          |                           |          |
| Eotaxin-2    | 59                  | 63.5           | 51        | 60            |                           |          |
| Eotaxin-3    | 73.5                | 74.5           | 47.5      | 51.5          |                           |          |
| FGF-6        | 147.5               | 130.5          | 104.5     | 97            |                           |          |
| FGF-7        | 80.5                | 31             | 54        | 72            |                           |          |
| Fit-3 Ligand | 148.5               | 492            | 141       | 63            | 3.31                      |          |
| Fractalkine  | 18                  | 9              | 78.5      | 10            |                           |          |
| GCP-2        | 9                   | 10             | 10        | 11            |                           |          |
| GDNF         | 115.5               | 111.5          | 78        | 128.5         |                           |          |
| GM-CSF       | 13                  | 10             | 10        | 11            |                           |          |
| I-309        | 5                   | 6.5            | 6         | 15.5          |                           |          |
| IC 1         | 3578.5              | 4522           | 6074      | 1242          | 1.26                      | 0.20     |
| IC 2         | 1797.5              | 1811           | 2772.5    | 427           | 1.01                      | 0.15     |
| IC 3         | 337                 | 286            | 484       | 182           | 0.85                      | 0.38     |
| IFN-gamma    | 9                   | 10             | 10        | 11            |                           |          |
| IGF-1        | 34.5                | 7.5            | 35.5      | 24.5          |                           |          |
| IGFBP-1      | 6165                | 4689           | 8862      | 6231.5        | 0.76                      | 0.70     |
| IGFBP-2      | 21.5                | 21.5           | 13.5      | 26.5          |                           |          |
| IGFBP-4      | 835.5               | 628            | 1074      | 220           | 0.75                      | 0.20     |
| IL-10        | 66.5                | 28             | 81.5      | 84            |                           |          |
| IL-13        | 85                  | 51             | 76        | 67            |                           |          |

|             |         |         |         |         |      |       |
|-------------|---------|---------|---------|---------|------|-------|
| IL-15       | 93      | 42      | 84      | 50.5    |      |       |
| IL-16       | 87      | 18      | 69.5    | 51      |      |       |
| IL-1alpha   | 109     | 61      | 125     | 260.5   |      | 2.08  |
| IL-1beta    | 9       | 10      | 10      | 11      |      |       |
| IL-1ra      | 320.5   | 255.5   | 261     | 286     | 0.80 | 1.10  |
| IL-2        | 77.5    | 51.5    | 66.5    | 94.5    |      |       |
| IL-3        | 413.5   | 357.5   | 383     | 446.5   | 0.86 | 1.17  |
| IL-4        | 95.5    | 111     | 114     | 134     |      |       |
| IL-5        | 92.5    | 70      | 103.5   | 106.5   |      |       |
| IL-6        | 8422    | 1669    | 6668.5  | 4348    | 0.20 | 0.65  |
| IL-7        | 141     | 139.5   | 145     | 181.5   |      |       |
| LIGHT       | 57.5    | 65.5    | 73      | 80      |      |       |
| Leptin      | 52      | 31      | 43.5    | 70.5    |      |       |
| M-CSF       | 73.5    | 7.5     | 88.5    | 85.5    |      |       |
| MCP-1       | 3163.5  | 17935.5 | 568.5   | 993.5   | 5.67 | 1.75  |
| MCP-2       | 47      | 13      | 54.5    | 40      |      |       |
| MCP-3       | 31      | 11.5    | 53      | 60.5    |      |       |
| MCP-4       | 28      | 8       | 33      | 26.5    |      |       |
| MDC         | 138.5   | 74.5    | 123.5   | 158.5   |      |       |
| MIG         | 88.5    | 61.5    | 87.5    | 99.5    |      |       |
| MIP-1 delta | 16      | 10      | 101     | 6       |      |       |
| MIP-3 alpha | 50      | 57.5    | 60      | 89.5    |      |       |
| NAP-2       | 28.5    | 41      | 10.5    | 9       |      |       |
| NEG         | 10.25   | 13.75   | 9.13    | 8.38    |      |       |
| NT-3        | 256     | 259     | 381     | 340.5   | 1.01 | 0.89  |
| PARC        | 108.5   | 99.5    | 107     | 98      |      |       |
| PDGF-BB     | 1870.5  | 1607    | 1480    | 1814    | 0.86 | 1.23  |
| POS1        | 58385   | 59083   | 57215   | 65526.5 | 1.01 | 1.15  |
| POS2        | 29774   | 28243   | 28136   | 30407.5 | 0.95 | 1.08  |
| POS3        | 16261.5 | 16085.5 | 16117.5 | 15517.5 | 0.99 | 0.96  |
| RANTES      | 2652.5  | 15478   | 686.5   | 13365   | 5.84 | 19.47 |
| SCF         | 140.5   | 304.5   | 157     | 212     | 2.17 | 1.35  |

|                 |        |        |        |        |      |      |
|-----------------|--------|--------|--------|--------|------|------|
| SDF-1           | 61     | 86.5   | 37.5   | 98     |      |      |
| TARC            | 37     | 29     | 38     | 36     |      |      |
| TGF-beta1       | 141.5  | 116.5  | 150.5  | 181    |      |      |
| TGF-beta3       | 59     | 44.5   | 64.5   | 63     |      |      |
| TNF-alpha       | 159.5  | 97.5   | 130.5  | 172.5  |      |      |
| TNF-beta        | 265.5  | 240.5  | 270    | 231.5  | 0.91 | 0.86 |
| Acrp30          | 22     | 10     | 44     | 16.5   |      |      |
| AgRP            | 87     | 73     | 116.5  | 106    |      |      |
| Amphi-regulin   | 361.5  | 72.5   | 223.5  | 394    | 0.20 | 1.76 |
| Angio-poietin-2 | 104    | 94     | 186.5  | 107.5  |      |      |
| Axl             | 364.5  | 194    | 629.5  | 194.5  | 0.53 | 0.31 |
| BTC             | 10.5   | 26     | 11     | 16     |      |      |
| CCL-28          | 188.5  | 6.5    | 122    | 51.5   |      |      |
| CTACK           | 200    | 206    | 229    | 289.5  | 1.03 | 1.26 |
| Dtk             | 156    | 10     | 68     | 51.5   |      |      |
| EGF-R           | 5038.5 | 2654   | 3370   | 1045.5 | 0.53 | 0.31 |
| ENA-78          | 28.5   | 22.5   | 69     | 60.5   |      |      |
| FGF-4           | 217.5  | 209    | 319    | 255    | 0.96 | 0.80 |
| FGF-9           | 157.5  | 81     | 163.5  | 113.5  |      |      |
| GCSF            | 160.5  | 148    | 195.5  | 194.5  |      |      |
| GITR            | 93     | 45.5   | 183.5  | 106.5  |      |      |
| GITR-Ligand     | 50     | 10     | 58.5   | 21     |      |      |
| GRO             | 2346.5 | 2866.5 | 1365.5 | 5337.5 | 1.22 | 3.91 |
| GRO-alpha       | 118    | 115.5  | 176.5  | 185.5  |      |      |
| HCC-4           | 62     | 49.5   | 54     | 62     |      |      |
| HGF             | 22.5   | 18     | 47.5   | 78     |      |      |
| I-TAC           | 54     | 19     | 60.5   | 51.5   |      |      |
| IC 1            | 117    | 195    | 160.5  | 212    |      | 1.32 |
| IC 2            | 121    | 174    | 182    | 85     |      |      |
| IC 3            | 67     | 198    | 61.5   | 69     |      |      |
| ICAM-1          | 2025.5 | 641    | 1134.5 | 367    | 0.32 | 0.32 |

|                      |         |        |             |         |        |      |
|----------------------|---------|--------|-------------|---------|--------|------|
| ICAM-3               | 39.5    | 10     | 16.5        | 10      |        |      |
| IGF-I SR             | 10      | 7.5    | 14          | 9.5     |        |      |
| IGFBP-3              | 86.5    | 22     | 16          | 9.5     |        |      |
| IGFBP-6              | 3179    | 2711.5 | 4267        | 3389    | 0.85   | 0.79 |
| IL-1 R1              | 38      | 8.5    | 33          | 62.5    |        |      |
| IL-1 R4/ST2          | 191.5   | 73     | 222         | 214     |        | 0.96 |
| IL-11                | 22.5    | 10     | 29.5        | 144.5   |        |      |
| IL-12 p40            | 212.5   | 75     | 195.5       | 130.5   | 0.35   |      |
| IL-12 p70            | 81      | 50.5   | 111         | 54      |        |      |
| IL-17                | 77      | 37.5   | 110.5       | 77      |        |      |
| IL-2R alpha          | 155.5   | 87     | 98.5        | 108.5   |        |      |
| IL-6R                | 2126.5  | 1502.5 | 2086.5      | 781     | 0.71   | 0.37 |
| IL-8                 | 2471.5  | 980.5  | 2804        | 871.5   | 0.40   | 0.31 |
| Lympho-tactin        | 36      | 10     | 34.5        | 47.5    |        |      |
| MIF                  | 1472.5  | 4899   | 947         | 4812    | 3.33   | 5.08 |
| MIP-1 alpha          | 7       | 17.5   | 49.5        | 17      |        |      |
| MIP-1 beta           | 16.5    | 10     | 35.5        | 33      |        |      |
| MIP-3 beta           | 42      | 10     | 39          | 33.5    |        |      |
| MSP-alpha            | 461     | 385    | 616.5       | 660     | 0.84   | 1.07 |
| NEG                  | 7.13    | 10     | 11.88       | 4.13    |        |      |
| NT-4                 | 31.5    | 10     | 53          | 36.5    |        |      |
| Oncostatin M         | 159     | 178    | 281         | 234     |        | 0.83 |
| Osteo-<br>protegerin | 205.5   | 46237  | 129         | 168.5   | 225.00 |      |
| PIGF                 | 21      | 10     | 23.5        | 22.5    |        |      |
| POS1                 | 59113.5 | 63651  | 67573.<br>5 | 71286.5 | 1.08   | 1.05 |
| POS2                 | 36542.5 | 37410  | 37153.<br>5 | 37018.5 | 1.02   | 1.00 |
| POS3                 | 18203.5 | 18483  | 17287.<br>5 | 17381   | 1.02   | 1.01 |
| TECK                 | 41      | 17     | 9.5         | 9.5     |        |      |



|                |        |        |        |         |        |       |
|----------------|--------|--------|--------|---------|--------|-------|
| TIMP-1         | 4501   | 3057.5 | 4177   | 2917    | 0.68   | 0.70  |
| TIMP-2         | 6841.5 | 5739   | 8774   | 8711.5  | 0.84   | 0.99  |
| TRAIL R3       | 84.5   | 12653  | 162.5  | 3896    | 149.74 | 23.98 |
| TRAIL R4       | 42     | 7      | 58     | 31.5    |        |       |
| Thrombopoietin | 55     | 75.5   | 84.5   | 38.5    |        |       |
| VEGF           | 3099   | 1543.5 | 2766   | 2108.5  | 0.50   | 0.76  |
| VEGF-D         | 24     | 10     | 33     | 29      |        |       |
| b FGF          | 1022.5 | 1217   | 1357   | 24450.5 | 1.19   | 18.02 |
| b-NGF          | 75.5   | 27.5   | 92.5   | 49      |        |       |
| fas/TNFRSF6    | 1113   | 1396   | 1167   | 1198.5  | 1.25   | 1.03  |
| sTNF R I       | 33     | 13.5   | 54     | 77      |        |       |
| sTNF R II      | 620    | 34.5   | 214    | 221.5   | 0.06   | 1.04  |
| sgp130         | 557.5  | 515    | 387    | 1466    | 0.92   | 3.79  |
| uPAR           | 5940.5 | 1080   | 3785.5 | 6172    | 0.18   | 1.63  |
